# Supplementary material for: The effect of fluorination on the surface structure of truxenones
Source: Royal Society of Chemistry journal article supplement (doi:10.1039/c6ra14158g), 2016-01-01
Supplement: c6ra14158g1.pdf [file c6ra14158g1.pdf]

## Supporting Information for “The effect of fluorination on the surface structure of truxenones”

L. A. Rochford, A. J. Ramadan, S. Holliday, T. S. Jones and C. Nielsen

### S1 – Synthesis and NMR analysis of truxenone

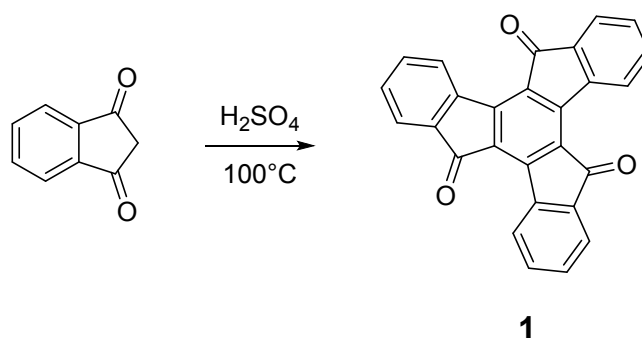

#### Truxenone (1)

1,3-Indanedione (20.00g, 137 mmol) was added portion-wise to concentrated sulphuric acid (200 ml) under stirring. The reaction mixture was heated to  $100^\circ\text{C}$  for 3 hours and subsequently poured onto ice (1L). The crude product was isolated by filtration and washed with copious amounts of water and acetone. The title compound was obtained as a yellow solid (13.81 g, 35.9 mmol, 79% yield) after trituration with dichloromethane.

$^1\text{H}$  NMR (400 MHz, chloroform- $d$ , 293 K)  $\delta$  9.30 (dt,  $J = 7.7$ , 1.0 Hz, 1H), 7.90 – 7.83 (dt,  $J = 7.4$ , 1.0 Hz, 1H), 7.74 (td,  $J = 7.7$ , 1.0 Hz, 1H), 7.58 (td,  $J = 7.4$ , 1.0 Hz, 1H).

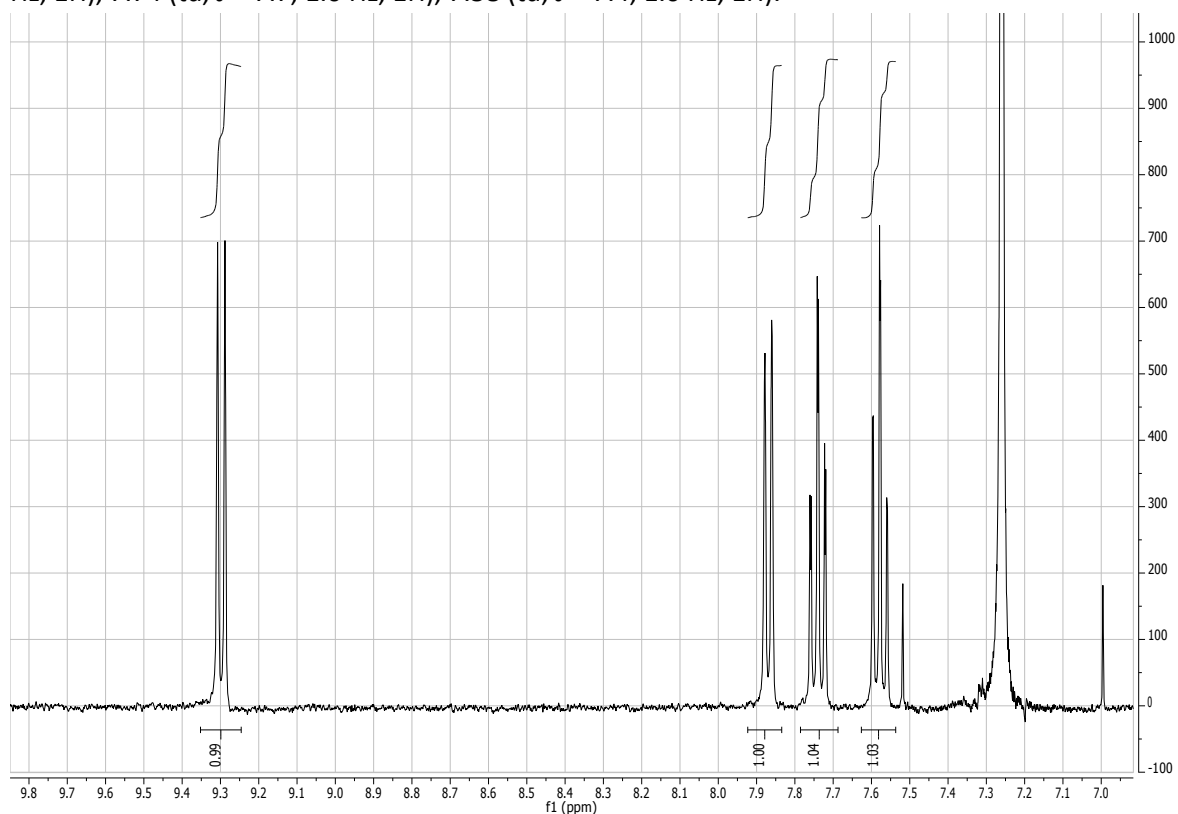

## S2 – Synthesis and NMR analysis of 4,9,14-trifluorotruxenone

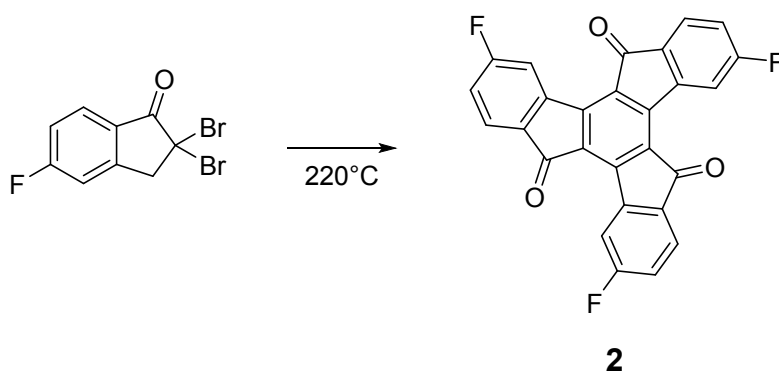

### 4,9,14-Trifluorotruxenone (2)

2,2-Dibromo-5-fluoroindan-1-one (1.40 g, 4.55 mmol) was placed in a round-bottom flask and under argon flow heated to 220°C with stirring for 1 hour. The crude product was washed with chloroform and dichloromethane to afford the title compound as a yellow solid (172 mg, 0.392 mmol, 26% yield).

<sup>1</sup>H NMR (400 MHz, 1,1,2,2-tetrachloroethane-d<sub>2</sub>, 393 K) δ 9.08 (dd, J = 9.5, 2.2 Hz, 1H), 7.95 (dd, J = 8.2, 5.3 Hz, 1H), 7.31 (td, J = 8.2, 2.2 Hz, 1H).

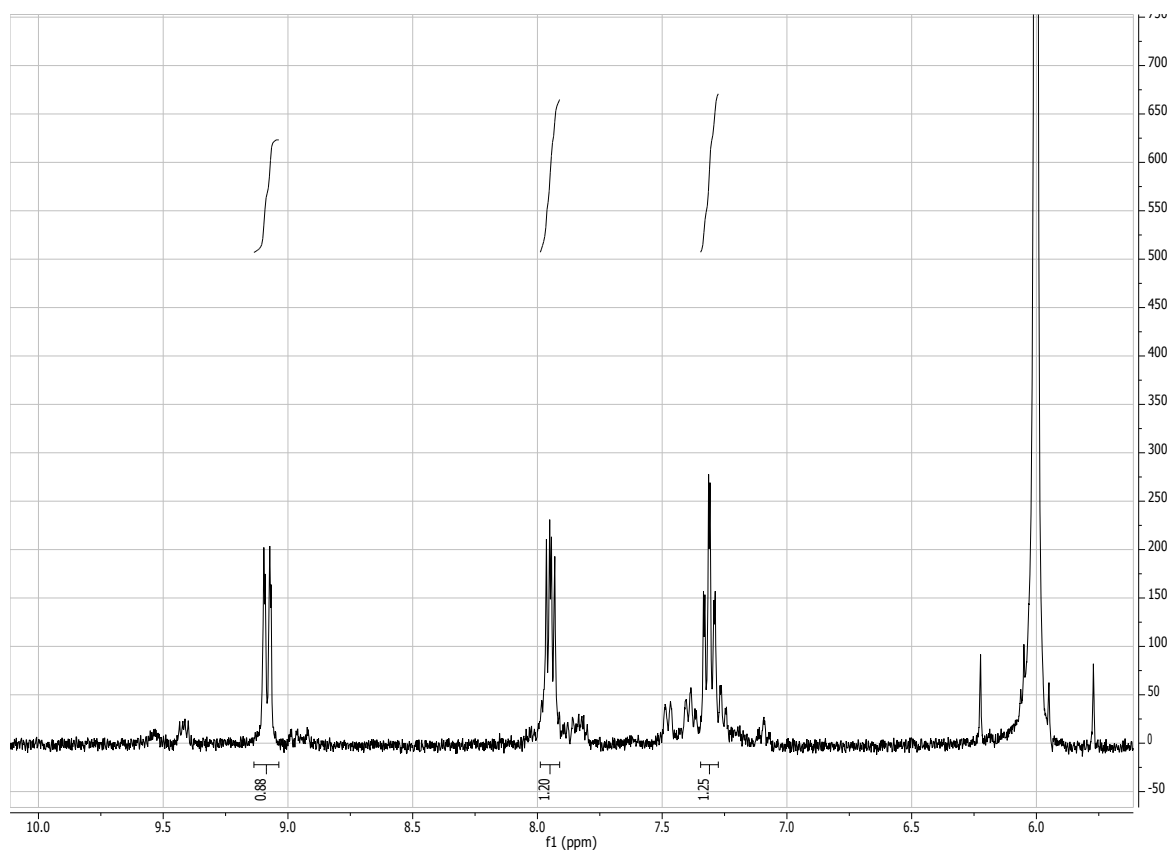

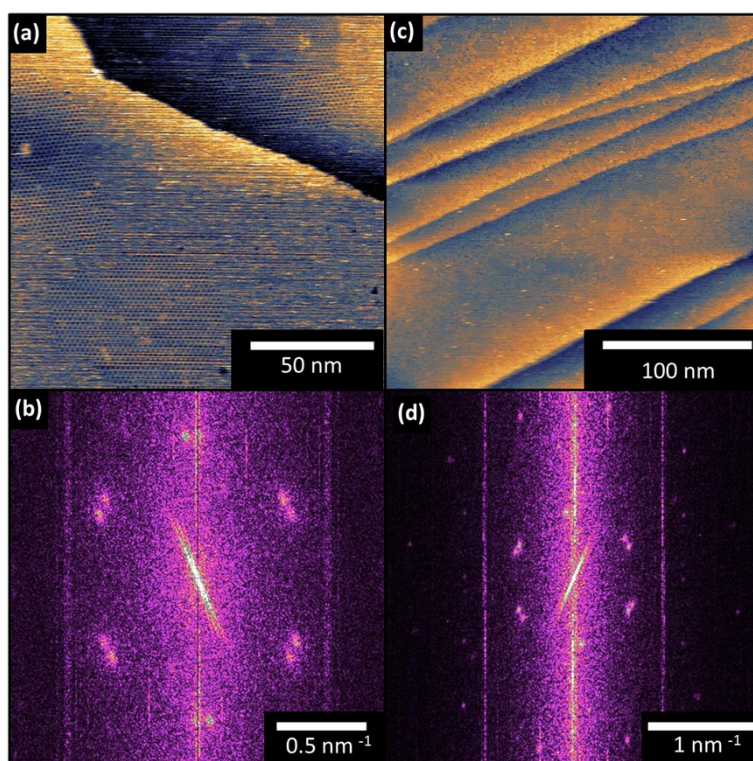

**Figure S3** - STM images of F<sub>3</sub>-truxenone / Cu (111) with corresponding 2D-FFT images at (a) high ( $V_s = -2$  V,  $I_T = 65$  pA) / (b) and lower (c) ( $V_s = -1.5$  V,  $I_T = 125$  pA) / (d) magnification.
